# Supplementary material
Source: PubMed Central journal article supplement (PMC3043942)
Supplement: Supp_Data.pdf [file Supp_Data.pdf]

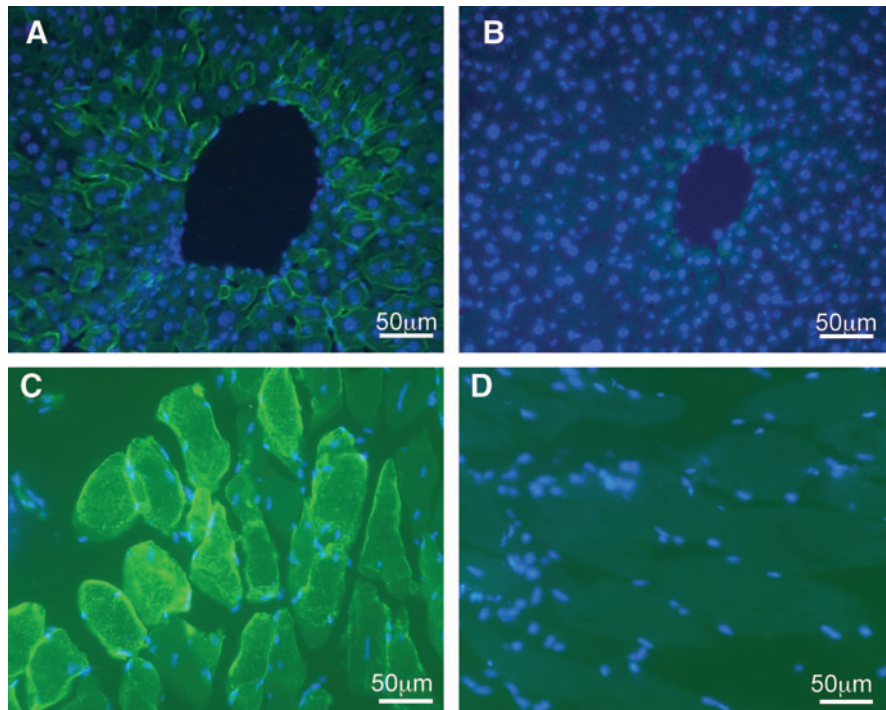

**SUPPLEMENTARY FIG. S1.** Assessment of hSSTR2 expression by immunofluorescence in murine liver and muscle transduced with AAV. Adult C57bl/6 mice were injected with  $1 \times 10^{11}$  gc of AAV2/1-TBG-hSSTR2 (A) or AAV2/1-CMV-hSSTR2 (C), and transduced tissues were collected 6 months later. hSSTR expression was assessed by anti-SSTR2 immunofluorescence. A specific, membrane-localized, FITC signal is evident in both transduced liver (A) and muscle (C). Immunofluorescence analysis with anti-SSTR2 antibodies of liver (B) and muscle (D) sections from control uninjected mice was also performed.

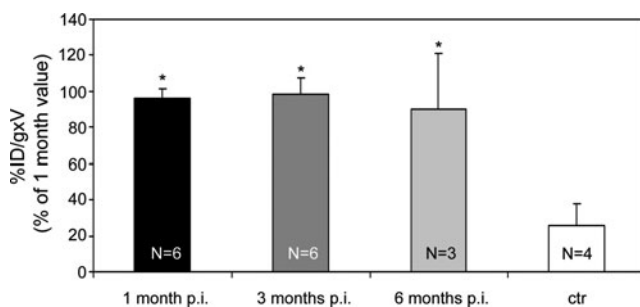

**SUPPLEMENTARY FIG. S2.** Persistence of high  $^{68}\text{Ga}$ -DOTATATE uptake in liver of immunodeficient mice injected with AAV. PET imaging of hSSTR2 following systemic administration of  $^{68}\text{Ga}$ -DOTATATE was performed 1, 3, and 6 months after AAV delivery, and the %ID/g $\times$ V was measured. The bar labeled "ctr" corresponds to control mice injected with AAV2/8-TBG-eGFP or AAV2/8-TBG-LacZ vectors ( $n=4$ ). The %ID/g $\times$ V value is expressed as percentage of the %ID/g $\times$ V measured in mice injected with AAV2/8-TBG-hSSTR2 1 month post injection. Results are reported as means  $\pm$  SE.  $*p \leq 0.03$  vs. ctr. The number of animals analyzed in each group is reported in the corresponding bar.
